# Supplementary material for: Self-organisation effects in dynamic nanoscale gels self-assembled from simple mixtures of commercially available molecular-scale components
Source: Royal Society of Chemistry journal article supplement (doi:10.1039/c2sc21547k), 2012-11-16
Supplement: c2sc21547k.pdf [file c2sc21547k.pdf]

# **Self-Organisation Effects in Dynamic Nanoscale Gels Self-Assembled from Simple Mixtures of Commercially Available Molecular-Scale Components**

**Michelle M. Smith, William Edwards and David K. Smith\***

Department of Chemistry, University of York, Heslington, York, YO10 5DD, UK

## **SUPPORTING INFORMATION**

### **Contents**

|   |                                            |
|---|--------------------------------------------|
| 1 | Synthesis of Lauric Hydrazide              |
| 2 | Thermal Stability of Gels and Gel Mixtures |
| 3 | NMR Analysis of Gels                       |
| 4 | Differential Scanning Calorimetry          |
| 5 | References                                 |

## 1. Synthesis of Lauric Hydrazide

Although commercially available from Chinese suppliers, we synthesised lauric hydrazide using a modification of a procedure previously described in the literature.<sup>1</sup> Methyl laurate (5.2 g, 24.26 mmol) was placed in a round bottom flask along with ethanol (65 mL). Hydrazine monohydrate was added to the mixture through a syringe. The solution was stirred at 80 °C for 5 hours, and left to stir at room temperature overnight, after which a white crystalline precipitate had appeared which was filtered off to give the product in essentially quantitative yield. Yield: 5.2 g (100 %); m.p. 105-106 °C, <sup>1</sup>H NMR (CDCl<sub>3</sub>-d, 400 MHz) δ 0.87 (t, 3H, *J* = 6.8 Hz), 1.25-1.29 (m, 16H), 1.62-1.65 (m, 2H), 2.14 (m, 2H), 3.89 (bs, 2H), 6.69 (bs, 1H). <sup>13</sup>C NMR (CDCl<sub>3</sub>-d, 100 MHz) δ 14.10, 22.66, 25.48, 29.26, 29.28, 29.30, 29.44, 29.57, 31.88, 34.58, 174.01. ESI-MS (*m/z*) calculated value for C<sub>12</sub>H<sub>27</sub>N<sub>2</sub>O [M] requires: 215.2118; (ES<sup>+</sup>) found: 215.2117 (100%, [M+H]<sup>+</sup>).

## 2. Thermal Stability of Gels and Gel Mixtures

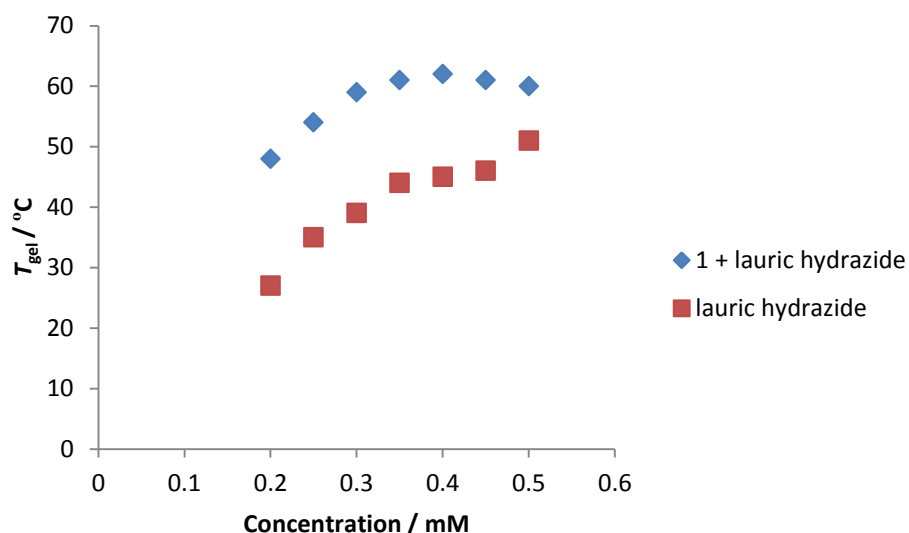

**Fig. S1.**  $T_{gel}$  data obtained from tube inversion experiments showing that reaction between undecanal (**1**) and lauric hydrazide forms the acyl hydrazone which leads to a more thermally stable gel network.

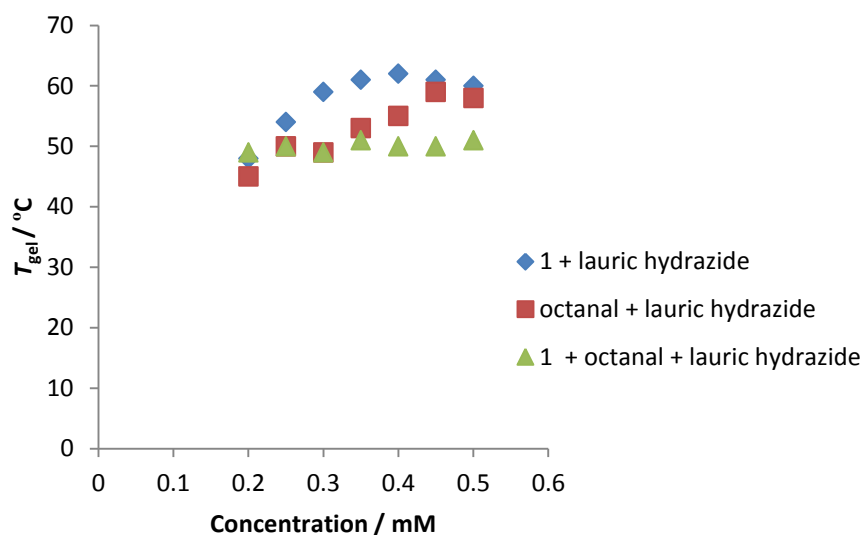

**Fig. S2.**  $T_{gel}$  data obtained from tube inversion experiments showing that undecanal (**1**) and lauric hydrazide (blue diamonds) form a more stable gel than octanal and lauric hydrazide (red squares). Both ‘pure’ gelation systems are more effective than the mixed system (green triangles) – indicative of co-assembly.

### 3. NMR Analysis of Gels

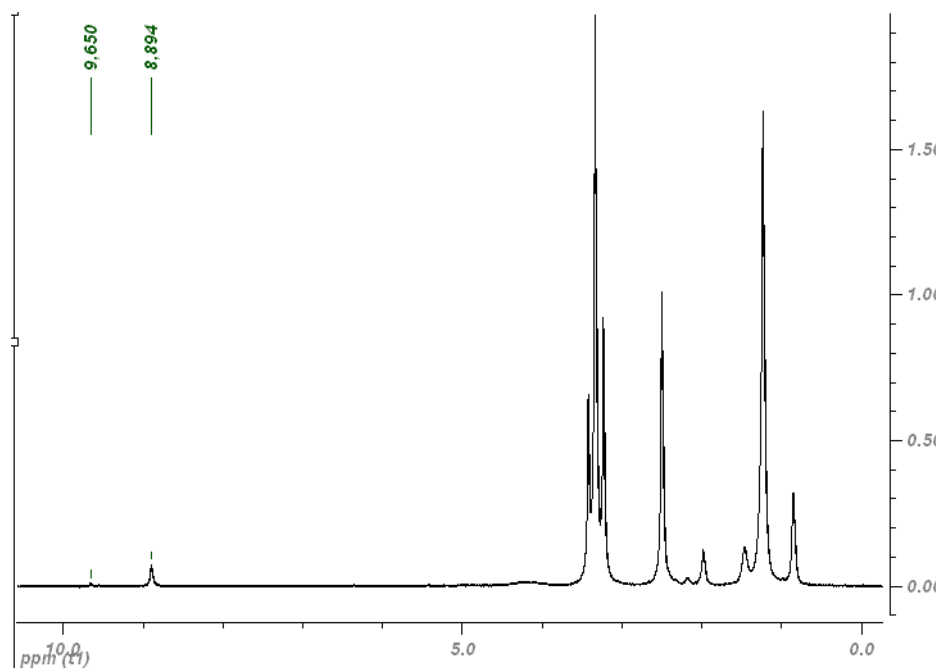

**Fig. S3.**  $^1H$  NMR spectrum of gel formed from undecanal (**1**) and lauric hydrazide at 25°C. Only peaks associated with the two ‘starting materials’ can be observed.

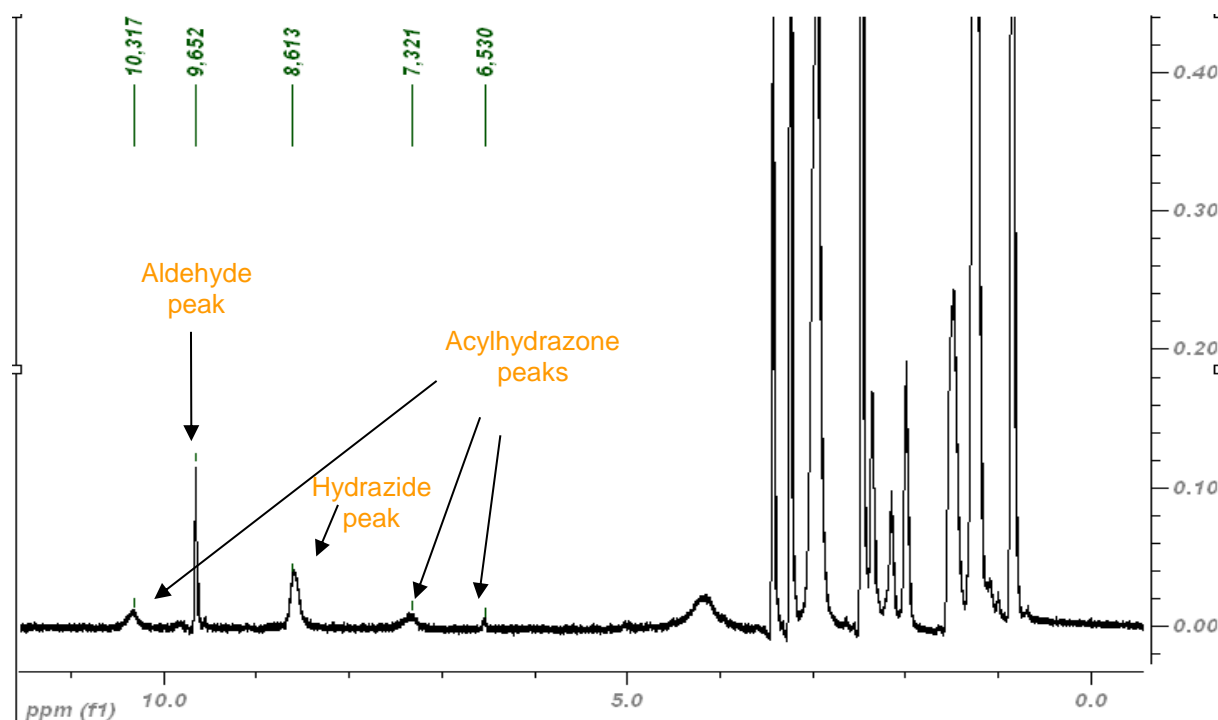

**Fig. S4.**  $^1\text{H}$  NMR spectrum of sol formed from undecanal (**1**) and lauric hydrazide at  $110^\circ\text{C}$ . In addition to the peaks for the aldehyde and hydrazide, peaks associated with the mobile acylhydrazone product can also now be observed. The peaks are broad owing to the fact the acylhydrazone is still undergoing some aggregation even in the sol at NMR concentrations.

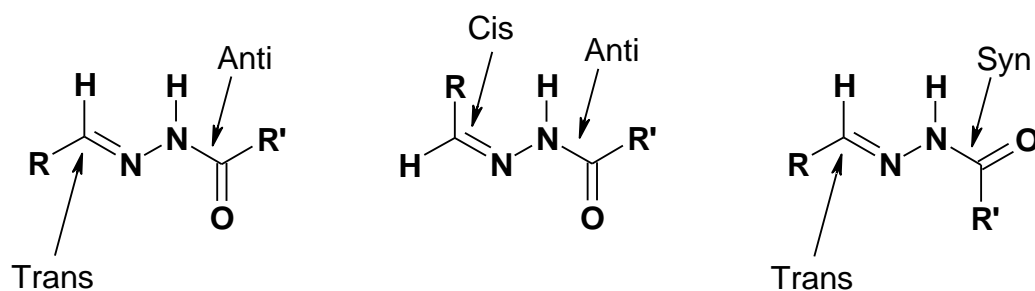

**Fig. S5.** Schematic diagram showing how acyl hydrazones can exist in a number of different conformations at elevated temperature.

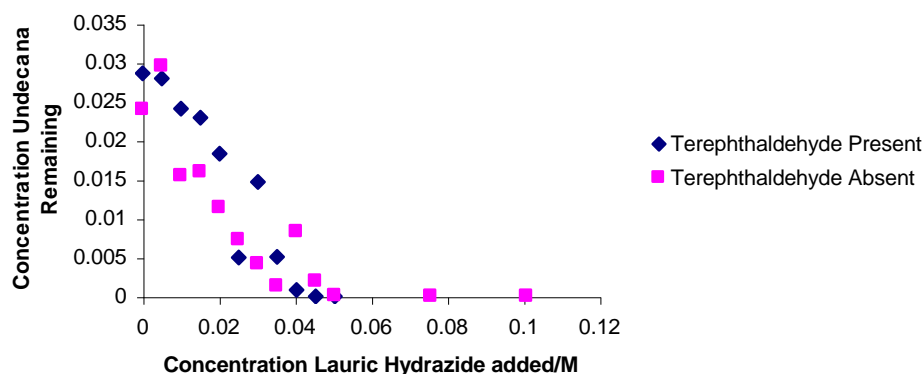

**Fig. S6.** NMR assessment of concentration of undecanal (**1**) on the addition of lauric hydrazide, demonstrating (pink squares) that it reacts in an equimolar manner with lauric hydrazide. In the presence of terephthaldehyde (blue diamonds), the undecanal is still depleted in a similar way.

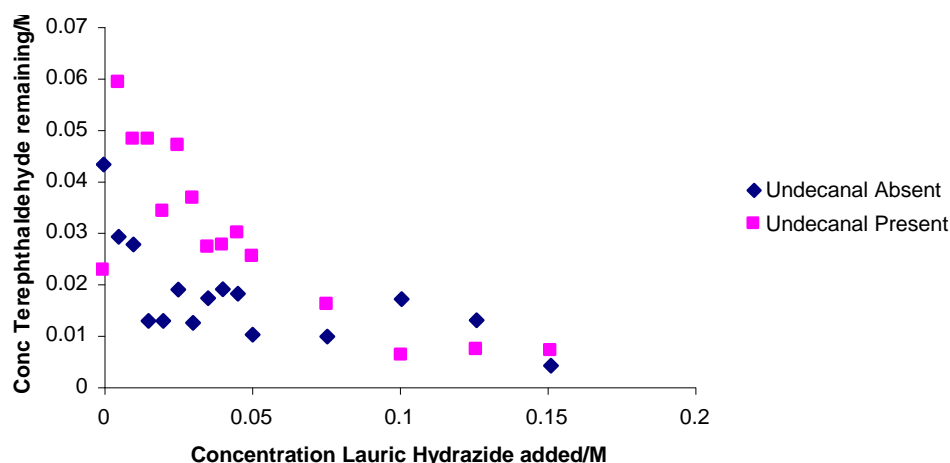

**Fig. S7.** NMR assessment of concentration of terephthaldehyde (**4**) on the addition of lauric hydrazide, demonstrating (blue diamonds) that it reacts with lauric hydrazide. In the presence of undecanal (pink squares), the terephthaldehyde is not depleted in the same way, and is only fully depleted once all of the undecanal has reacted. However, this does show that some reaction is taking place between terephthaldehyde and lauric hydrazide.

#### 4. Differential Scanning Calorimetry

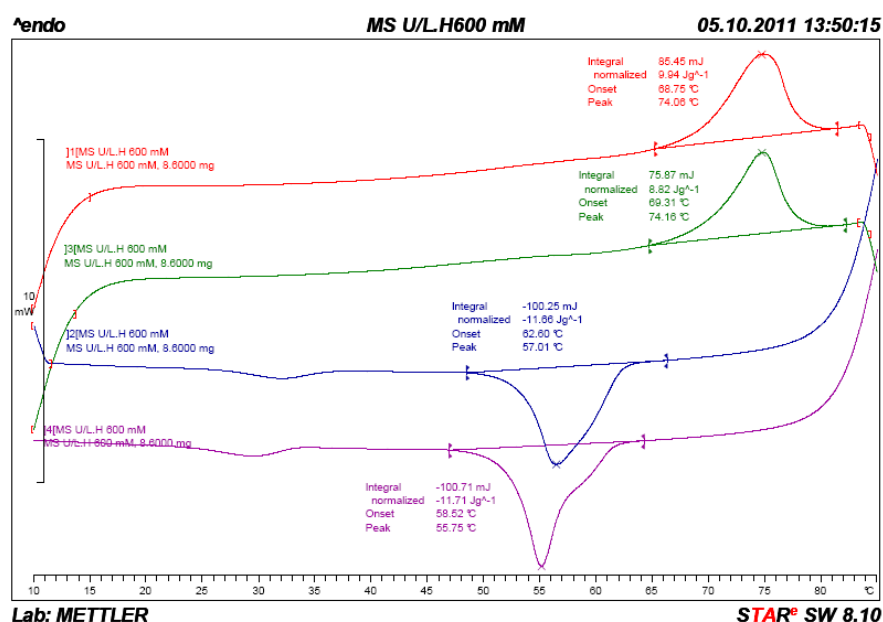

**Fig. S8.** Differential scanning calorimetry for undecanal (**1**) and lauric hydrazide (both 600 mM) in DMSO (total sample mass 8.60 mg). Endotherm peaks (gel-sol) at 74.1°C on both cycles, exotherm peaks (sol-gel) at 57.0 °C and 55.8°C on cycles 1 and 2 respectively.

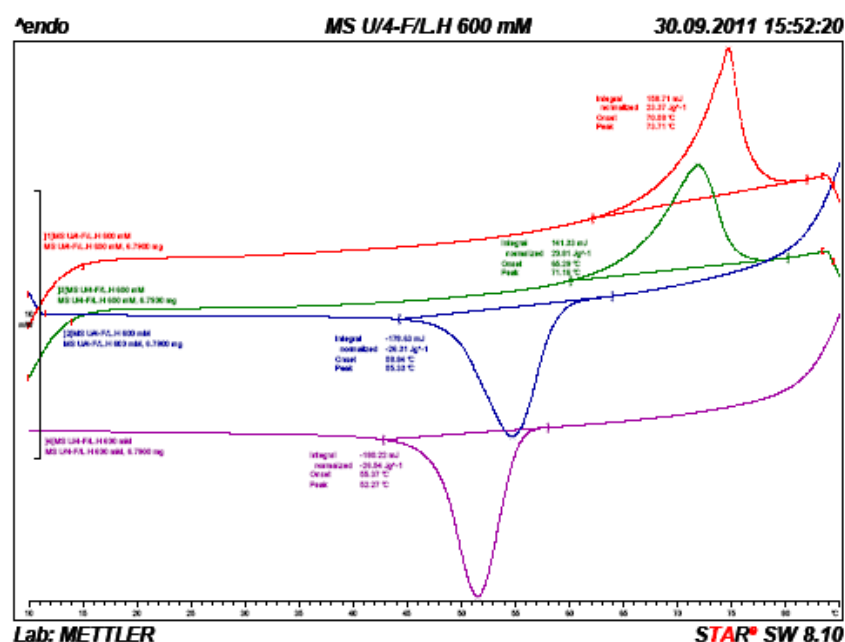

**Fig. S9.** Differential scanning calorimetry for undecanal (**1**), 4-fluorobenzaldehyde (**2**) and lauric hydrazide (all 600 mM) in DMSO (total sample mass 6.79 mg). Endotherm peaks (gel-sol) at 73.7°C and 71.2°C, exotherm peaks (sol-gel) at 55.3°C and 50.2°C on cycles 1 and 2 respectively.

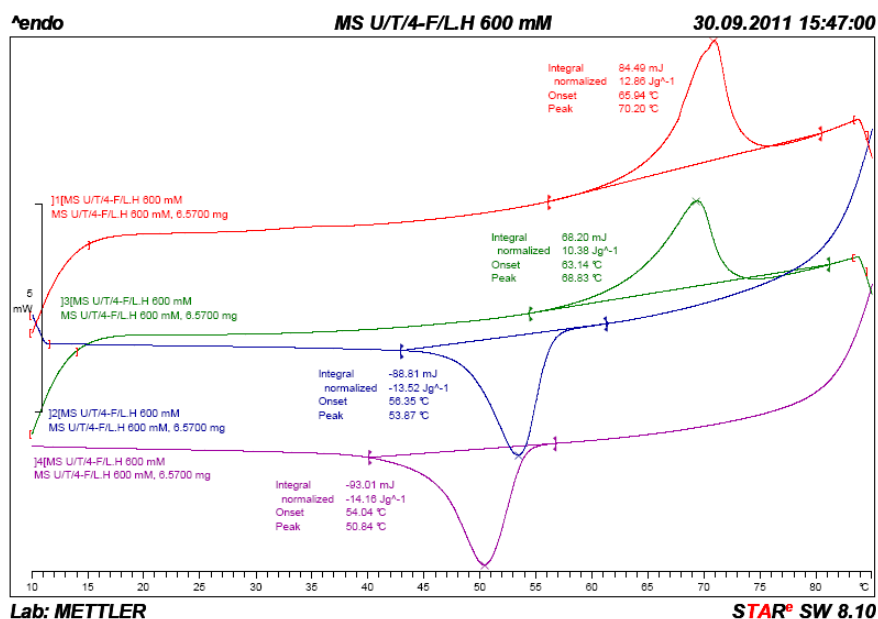

**Fig. S10.** Differential scanning calorimetry for undecanal (1), 4-fluorobenzaldehyde (2), terephthalaldehyde (4) and lauric hydrazide (all 600 mM) in DMSO (total sample mass 6.57 mg). Endotherm peaks (gel-sol) at 70.2°C and 68.8°C, exotherm peaks (sol-gel) at 53.9°C and 50.8°C on cycles 1 and 2 respectively.

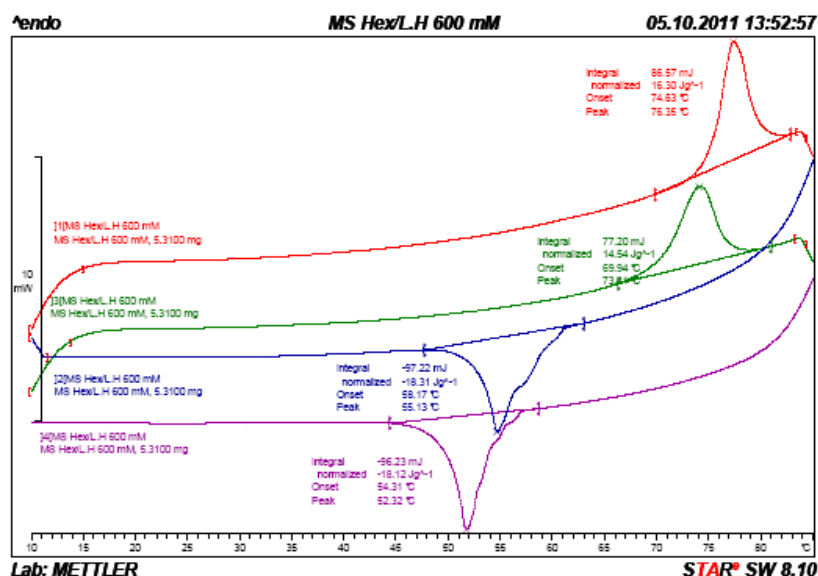

**Fig. S11.** Differential scanning calorimetry for hexanal (5) and lauric hydrazide (all 600 mM) in DMSO (total sample mass 5.31 mg). Endotherm peaks (gel-sol) at 76.4°C and 73.3°C, exotherm peaks (sol-gel) at 55.1°C and 52.3°C on cycles 1 and 2 respectively.

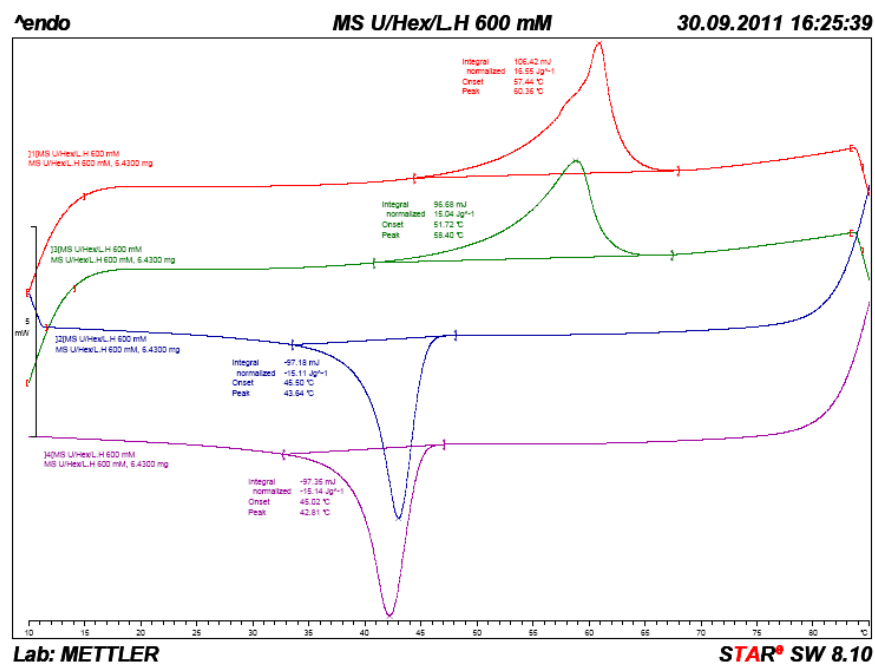

**Fig. S12.** Differential scanning calorimetry for undecanal (**1**), hexanal (**5**) and lauric hydrazide (all 600 mM) in DMSO (total sample mass 5.31 mg). Endotherm peaks (gel-sol) at 60.4°C and 58.4°C, exotherm peaks (sol-gel) at 43.6°C and 42.8°C on cycles 1 and 2 respectively.

## 5. References

- 1 S. Awasthi, P. Rishishwar, A. N. Rao, K. Ganesan, R. C. Malhotra, *J. Kor. Chem. Soc.*, 2007, **51**, 506.
